# Supplementary material
Source: Springer Nature journal article supplement (https://www.springermedizin.de/resource/supplementary/13045_2014_400_MOESM4_ESM.pdf/9661292)
Supplement: MOESM4 [file 9661292]

**Additional file 4- Differentially expressed miRNAs in LSK compared to promyelocytes that have predicted targets showing inversely correlated expression**

| MicroRNA name ( LSK/Promyelocytes expression ) | Target mRNAs (LSK/ Promyelocytes expression)                                                      |
|------------------------------------------------|---------------------------------------------------------------------------------------------------|
| mmu-let-7a (↓)                                 | <i>Hlf</i> (↑)<br><i>Klf12</i> (↑)<br><i>Mycn</i> (↑)                                             |
| mmu-let-7d (↓)                                 | <i>Hlf</i> (↑)<br><i>Klf12</i> (↑)<br><i>Mycn</i> (↑)                                             |
| mmu-let-7g (↓)                                 | <i>Hlf</i> (↑)<br><i>Klf12</i> (↑)<br><i>Mycn</i> (↑)                                             |
| mmu-let-7i (↓)                                 | <i>Hlf</i> (↑)<br><i>Klf12</i> (↑)<br><i>Mycn</i> (↑)                                             |
| mmu-miR-106a (↓)                               | <i>Hlf</i> (↑)<br><i>Klf12</i> (↑)<br><i>Mycn</i> (↑)<br><i>Trp53inp1</i> (↑)<br><i>Vldlr</i> (↑) |
| mmu-miR-106b* (↓)                              | <i>Hlf</i> (↑)<br><i>Klf12</i> (↑)<br><i>Mycn</i> (↑)<br><i>Trp53inp1</i> (↑)<br><i>Vldlr</i> (↑) |
| mmu-miR-130b (↓)                               | <i>Arhgef12</i> (↑)<br><i>Hlf</i> (↑)<br><i>Trp53inp1</i> (↑)                                     |
| mmu-miR-142-3p (↓)                             | <i>Arhgef12</i> (↑)                                                                               |
| mmu-miR-148a (↓)                               | <i>Arhgef12</i> (↑)<br><i>Hlf</i> (↑)                                                             |

|                  |                                                                                                        |
|------------------|--------------------------------------------------------------------------------------------------------|
| mmu-miR-149 (↓)  | <i>Prkg1</i> (↑)                                                                                       |
| mmu-miR-15a* (↓) | <i>Cobll1</i> (↑)<br><i>Eya1</i> (↑)<br><i>Prkg1</i> (↑)                                               |
| mmu-miR-15b* (↓) | <i>Cobll1</i> (↑)<br><i>Eya1</i> (↑)<br><i>Prkg1</i> (↑)                                               |
| mmu-miR-17 (↓)   | <i>Hlf</i> (↑)<br><i>Klf12</i> (↑)<br><i>Mycn</i> (↑)<br><i>Trp53inp1</i> (↑)<br><i>Vldlr</i> (↑)      |
| mmu-miR-195 (↓)  | <i>Cobll1</i> (↑)<br><i>Eya1</i> (↑)<br><i>Prkg1</i> (↑)                                               |
| mmu-miR-19a (↓)  | <i>Arhgef12</i> (↑)<br><i>Hlf</i> (↑)<br><i>Klf12</i> (↑)<br><i>Nfatc2</i> (↑)<br><i>Trp53inp1</i> (↑) |
| mmu-miR-19b (↓)  | <i>Arhgef12</i> (↑)<br><i>Hlf</i> (↑)<br><i>Klf12</i> (↑)<br><i>Nfatc2</i> (↑)<br><i>Trp53inp1</i> (↑) |
| mmu-miR-20a (↓)  | <i>Hlf</i> (↑)<br><i>Klf12</i> (↑)<br><i>Mycn</i> (↑)<br><i>Trp53inp1</i> (↑)<br><i>Vldlr</i> (↑)      |
| mmu-miR-21 (↓)   | <i>Arhgef12</i> (↑)                                                                                    |
| mmu-miR-223 (↓)  | <i>Hlf</i> (↑)                                                                                         |
| mmu-miR-27a (↓)  | <i>Eya1</i> (↑)                                                                                        |

|                    |                                                                                                   |
|--------------------|---------------------------------------------------------------------------------------------------|
|                    | <i>Prkg1</i> (↑)<br><i>Rgs1</i> (↑)<br><i>Zfp36</i> (↑)                                           |
| mmu-miR-27a* (↓)   | <i>Eyal</i> (↑)<br><i>Prkg1</i> (↑)<br><i>Rgs1</i> (↑)<br><i>Zfp36</i> (↑)                        |
| mmu-miR-27b (↓)    | <i>Eyal</i> (↑)<br><i>Prkg1</i> (↑)<br><i>Rgs1</i> (↑)<br><i>Zfp36</i> (↑)                        |
| mmu-miR-301a (↓)   | <i>Arhgef12</i> (↑)<br><i>Hlf</i> (↑)<br><i>Trp53inp1</i> (↑)                                     |
| mmu-miR-301b (↓)   | <i>Arhgef12</i> (↑)<br><i>Hlf</i> (↑)<br><i>Trp53inp1</i> (↑)                                     |
| mmu-miR-340-5p (↓) | <i>Angpt1</i> (↑)<br><i>Nfatc2</i> (↑)<br><i>Xrcc5</i> (↑)                                        |
| mmu-miR-494 (↓)    | <i>Arhgef12</i> (↑)<br><i>Hlf</i> (↑)                                                             |
| mmu-miR-93 (↓)     | <i>Hlf</i> (↑)<br><i>Klf12</i> (↑)<br><i>Mycn</i> (↑)<br><i>Trp53inp1</i> (↑)<br><i>Vldlr</i> (↑) |
| mmu-miR-155 (↑)    | <i>Csf1r</i> (↓)                                                                                  |
| mmu-miR-203 (↑)    | <i>Met</i> (↓)                                                                                    |
